# Supplementary material for: Production and Characterization of Graphene Oxide Surfaces against Uropathogens
Source: MDPI journal article supplement (doi:10.3390/coatings13081324), 2023-07-28
Supplement: s1 [file s1]

## Supplementary Material

**Table S1.** Average roughness ( $S_a$ ) and root mean square height ( $S_q$ ) values determined for each of the tested surfaces. Results are presented as mean  $\pm$  SD.

| Surface  | Surface roughness parameters ( $\mu\text{m}$ ) |                       |
|----------|------------------------------------------------|-----------------------|
|          | $S_a$                                          | $S_q$                 |
| PDMS     | 47.45 ( $\pm$ 8.42)                            | 47.45 ( $\pm$ 8.42)   |
| GNP/PDMS | 75.28 ( $\pm$ 6.88)                            | 75.28 ( $\pm$ 6.88)   |
| GO1/PDMS | 85.51 ( $\pm$ 9.16)                            | 85.51 ( $\pm$ 9.16)   |
| GO3/PDMS | 115.49 ( $\pm$ 13.86)                          | 115.49 ( $\pm$ 13.86) |
| GO5/PDMS | 116.03 ( $\pm$ 15.47)                          | 116.03 ( $\pm$ 15.47) |

Nomenclature:  $S_a$ —arithmetical mean height;  $S_q$ —root mean square height.
